# Supplementary material for: Stable Variable Selection Method with Shrinkage Regression Applied to the Selection of Genetic Variants Associated with Alzheimer’s Disease
Source: Preprints.org preprint supplement (doi:10.20944/preprints202403.0465.v1), 2024-03-08
Supplement: Supplementary file 1 [file supplementary]

## Sheet: new with covariates
	LASSO
SNPs	w	β, CI95%	OR, CI95%	AUC, CI95%		Accuracy		F1-measure
				Train set	Test set	Train set	Test set	Train set	Test set
rs6427160	0.8753	−0.0903, [−0.1401; −0.0405]	0.9137, [0.8693; 0.9603]	0.8583, [0.8153; 0.9014]	0.6227, [0.5235; 0.7219]	0.7943, [0.7455; 0.8375]	0.6444, [0.5575; 0.7249]	0.8354	0.7073
rs12054808	0.8810	−0.2137, [−0.3275; −0.0998]	0.8076, [0.7207; 0.9050]
rs4391167	0.8810	−0.0001, [−0.0008; 0.0005]	0.9999, [0.9992; 1.0005]
rs4982401	0.8753	0.0817, [0.0278; 0.1355]	1.0851, [1.0282; 1.1451]
rs11625567	0.8753	−0.1015, [−0.1772; −0.0257]	0.9035, [0.8376; 0.9746]
rs1052242	0.8683	−0.0403, [−0.0783; −0.0024]	0.9605, [0.9247; 0.9976]
rs486512	0.8810	−0.2411, [−0.3392; −0.1430]	0.7858, [0.7123; 0.8668]
rs573399	0.8753	0.1220, [0.0545; 0.1894]	1.1297, [1.0560; 1.2085]
rs2075650	0.8810	0.1844, [0.1208; 0.2481]	1.2025, [1.1284; 1.2816]
rs6090754	0.8683	−0.0294, [−0.0517; −0.0071]	0.9710, [0.9496; 0.9929]
rs11906462	0.8753	0.1221, [0.0472; 0.1970]	1.1299, [1.0484; 1.2177]
	ENET 0.75
SNPs	w	β, CI95%	OR, CI95%	AUC, CI95%		Accuracy		F1-measure
				Train set	Test set	Train set	Test set	Train set	Test set
rs2075650	1.0000	0.0154, [−0.0594; 0.0903]	1.0155, [0.9423; 1.0945]	0.6410, [0.5880; 0.6940]	0.6559, [0.5719; 0.7400]	0.6044, [0.5482; 0.6587]	0.6370, [0.5499; 0.7180]	0.6356	0.6839
	ENET 0.50
SNPs	w	β, CI95%	OR, CI95%	AUC, CI95%		Accuracy		F1-measure
				Train set	Test set	Train set	Test set	Train set	Test set
−
	ENET 0.25
SNPs	w	β, CI95%	OR, CI95%	AUC, CI95%		Accuracy		F1-measure
				Train set	Test set	Train set	Test set	Train set	Test set
−
	ENET 0.10
SNPs	w	β, CI95%	OR, CI95%	AUC, CI95%		Accuracy		F1-measure
				Train set	Test set	Train set	Test set	Train set	Test set
−
	ENET 0.05
SNPs	w	β, CI95%	OR, CI95%	AUC, CI95%		Accuracy		F1-measure
				Train set	Test set	Train set	Test set	Train set	Test set
rs2075650	1.0000	0.0001, [−0.0010; 0.0012]	1.0001, [0.9990; 1.0012]	0.6410, [0.5880; 0.6940]	0.6559, [0.5719; 0.7400]	0.6044, [0.5482; 0.6587]	0.6370, [0.5499; 0.7180]	0.6356	0.6839
	ENET 0.01
SNPs	w	β, CI95%	OR, CI95%	AUC, CI95%		Accuracy		F1-measure
				Train set	Test set	Train set	Test set	Train set	Test set
−

## Sheet: LR with covariates 
	Traditional Logistic Regression
SNPs	β, CI95%	OR, CI95%	p-value	AUC, CI95%		Accuracy		R2	F1-measure
				Train set	Test set	Train set	Test set	Train set	Train set	Test set
rs6427160	−0.8762, [−1.3627; −0.4132]	0.4163, [0.2560; 0.6616]	2.82e-04	0.8991, [0.8635; 0.9346]	0.6106, [0.5086; 0.7127]	0.8133, [0.7659; 0.8547]	0.6593, [0.5728; 0.7386]	0.5764	0.8392	0.7444
rs12054808	−1.5378, [−2.4635; −0.6590]	0.2148, [0.0851; 0.5174]	7.85e-04
rs4391167
rs4982401	0.9673, [0.4872; 1.4815]	2.6308, [1.6278; 4.3995]	1.28e-04
rs11625567	−1.0400, [−1.7110; −0.4005]	0.3534, [0.1807; 0.6700]	1.81e-03
rs1052242	−0.7877, [−1.2641; −0.3327]	0.4549, [0.2825; 0.7170]	8.73e-04
rs486512	−1.7490, [−2.6751; −0.9116]	0.1739, [0.0689; 0.4019]	8.68e-05
rs573399	1.5085, [0.8573; 2.2124]	4.5200, [2.3568; 9.1374]	1.18e-05
rs2075650	1.2667, [0.7277; 1.8550]	3.5492, [2.0702; 6.3919]	9.60e-06
rs6090754	−1.0201, [−1.6279; −0.4369]	0.3606, [0.1963; 0.6460]	7.48e-04
rs11906462	1.4289, [0.7180; 2.2258]	4.1743, [2.0504; 9.2610]	1.85e-04
	Traditional Logistic Regression
SNPs	β, CI95%	OR, CI95%	p-value	AUC, CI95%		Accuracy		R2	F1-measure
				Train set	Test set	Train set	Test set	Train set	Train set	Test set
rs2075650	0.98558, [0.5839; 1.4162]	2.6794, [1.7930; 4.1215]	3.27e-06	0.6410, [0.5880; 0.6940]	0.6559, [0.5719; 0.7400]	0.6044, [0.5482; 0.6587]	0.6370, [0.5499; 0.7180]	0.9394	0.6356	0.6839
	Traditional Logistic Regression
SNPs	β, CI95%	OR, CI95%	p-value	AUC, CI95%		Accuracy		R2	F1-measure
				Train set	Test set	Train set	Test set	Train set	Train set	Test set
−
	Traditional Logistic Regression
SNPs	β, CI95%	OR, CI95%	p-value	AUC, CI95%		Accuracy		R2	F1-measure
				Train set	Test set	Train set	Test set	Train set	Train set	Test set
−
	Traditional Logistic Regression
SNPs	β, CI95%	OR, CI95%	p-value	AUC, CI95%		Accuracy		R2	F1-measure
				Train set	Test set	Train set	Test set	Train set	Train set	Test set
−
	Traditional Logistic Regression
SNPs	β, CI95%	OR, CI95%	p-value	AUC, CI95%		Accuracy		R2	F1-measure
				Train set	Test set	Train set	Test set	Train set	Train set	Test set
rs2075650	0.98558, [0.5839; 1.4162]	2.6794, [1.7930; 4.1215]	3.27e-06	0.6410, [0.5880; 0.6940]	0.6559, [0.5719; 0.7400]	0.6044, [0.5482; 0.6587]	0.6370, [0.5499; 0.7180]	0.9394	0.6356	0.6839
	Traditional Logistic Regression
SNPs	β, CI95%	OR, CI95%	p-value	AUC, CI95%		Accuracy		R2	F1-measure
				Train set	Test set	Train set	Test set	Train set	Train set	Test set
−
rs4391167	SNP removed because of collinearity with rs12054808 (they are equal)

## Sheet: new without covariates
	LASSO
Covariates	w	β, CI95%	OR, CI95%	AUC, CI95%		Accuracy		F1-measure
				Train set	Test set	Train set	Test set	Train set	Test set
APOE4	1.0000	0.5357, [0.4992; 0.5722]	1.7086, [1.6474; 1.7721]	0.7845, [0.7356; 0.8335]	0.6492, [0.5530; 0.7454]	0.6867, [0.6324; 0.7375]	0.6741, [0.5881; 0.7522]	0.7114	0.7317
SNPs
rs12054808	0.9781	−0.1056, [−0.1503; −0.0609]	0.8998, [0.8605; 0.9409]
rs486512	0.9781	−0.0880, [−0.1338; −0.042]	0.9158, [0.8747; 0.9588]
	ENET 0.75
Covariates	w	β, CI95%	OR, CI95%	AUC, CI95%		Accuracy		F1-measure
				Train set	Test set	Train set	Test set	Train set	Test set
APOE4	1.0000	0.4436, [0.3908; 0.4963]	1.5582, [1.4782; 1.6426]	0.7193, [0.6698; 7688]	0.6702, [0.5823; 0.7582]	0.6867, [0.6324; 0.7375]	0.6741, [0.5881; 0.7522]	0.7288	0.7317
SNPs
−
	ENET 0.50
Covariates	w	β, CI95%	OR, CI95%	AUC, CI95%		Accuracy		F1-measure
				Train set	Test set	Train set	Test set	Train set	Test set
APOE4	1.0000	0.3337, [0.3085; 0.3588]	1.3961, [1.3614; 1.4316]	0.7845, [0.7356; 0.8335]	0.6492, [0.5530; 0.7454]	0.6867, [0.6324; 0.7375]	0.6741, [0.5881; 0.7522]	0.7114	0.7317
SNPs
rs12054808	1.0000	−0.0316, [−0.0531; −0.0101]	0.9689, [0.9483; 0.9900]
rs4391167	1.0000	−0.0316, [−0.0530; −0.0101]	0.9689, [0.9483; 0.9900]
rs486512	1.0000	−0.0544, [−0.0875; −0.0212]	0.9471, [0.9162; 0.9790]
	ENET 0.25
Covariates	w	β, CI95%	OR, CI95%	AUC, CI95%		Accuracy		F1-measure
				Train set	Test set	Train set	Test set	Train set	Test set
APOE4	1.0000	0.1835, [0.1527; 0.2142]	1.2014, [1.1650; 1.2389]	0.7848, [0.7359; 0.8337]	0.6463, [0.5502; 0.7424]	0.6930, [0.6390; 0.7435]	0.6741, [0.5881; 0.7522]	0.7298	0.7317
SNPs
rs12054808	1.0000	−0.0111, [−0.0406; 0.0183]	0.9889, [0.9602; 1.0185]
rs4391167	1.0000	−0.0111, [−0.0406; 0.0183]	0.9889, [0.9602; 1.0185]
rs486512	1.0000	−0.0232, [−0.0622; 0.0158]	0.9771, [0.9397; 1.0159]
	ENET 0.10
Covariates	w	β, CI95%	OR, CI95%	AUC, CI95%		Accuracy		F1-measure
				Train set	Test set	Train set	Test set	Train set	Test set
APOE4	1.0000	0.0778, [0.0768; 0.0787]	1.0809, [1.080; 1.082]	0.7828, [0.7328; 0.8327]	0.6578, [0.5630; 0.7525]	0.6930, [0.6390; 0.7435]	0.6741, [0.5881; 0.7522]	0.7298	0.7317
SNPs
rs12054808	1.0000	−0.0020, [−0.0031; −0.0009]	0.9980, [0.9969; 0.9991]
rs4391167	1.0000	−0.0020, [−0.0031; −0.0009]	0.9980, [0.9969; 0.9991]
rs486512	1.0000	−0.0076, [−0.0089; −0.0064]	0.9924, [0.9911; 0.9936]
rs2075650	1.0000	0.0002, [−0.0004; 0.0008]	1.0002, [0.9996; 1.0008]
	ENET 0.05
Covariates	w	β, CI95%	OR, CI95%	AUC, CI95%		Accuracy		F1-measure
				Train set	Test set	Train set	Test set	Train set	Test set
APOE4	1.0000	0.0451, [0.0447; 0.0455]	1.0461, [1.0457; 1.0465]	0.8116, [0.7641; 0.8590]	0.6667, [0.5699; 0.7635]	0.7025, [0.6488; 0.7524]	0.6963, [0.6113; 0.7724]	0.7330	0.7545
SNPs
rs6427160	1.0000	−0.0023, [−0.0026; −0.0021]	0.9977, [0.9974; 0.9979]
rs12054808	1.0000	−0.0068, [−0.0073; −0.0064]	0.9932, [0.9928; 0.9936]
rs4391167	1.0000	−0.0068, [−0.0073; −0.0064]	0.9932, [0.9928; 0.9936]
rs11625567	1.0000	−0.0001, [−0.0005; 0.0002]	0.9999, [0.9995; 1.0002]
rs486512	1.0000	−0.0104, [−0.0109; −0.0010]	0.9896, [0.9891; 0.9901]
rs573399	1.0000	0.0003, [0.0000; 0.0007]	1.0003, [1.0000; 1.0007]
rs2075650	1.0000	0.0059, [0.00562; 0.00614]	1.0059, [1.0056; 1.0062]
rs11906462	1.0000	0.0020, [0.0017; 0.0024]	1.0020, [1.0017; 1.0024]
	ENET 0.01
Covariates	w	β, CI95%	OR, CI95%	AUC, CI95%		Accuracy		F1-measure
				Train set	Test set	Train set	Test set	Train set	Test set
APOE4	1.0000	0.0095, [0.0094; 0.0095]	1.0095, [1.0095; 1.0095]	0.8125, [0.7652; 0.8598]	0.6686, [0.5721; 0.7652]	0.7057, [0.6521; 0.7554]	0.6963, [0.6113; 0.7724]	0.7365	0.7545
SNPs
rs6427160	1.0000	−0.0006, [−0.00065; −0.00063]	0.9994, [0.99935; 0.99937]
rs12054808	1.0000	−0.0016, [−0.00162; −0.00159]	0.9984, [0.99838; 0.99841]
rs4391167	1.0000	−0.0016, [−0.00162; −0.00159]	0.9984, [0.99838; 0.99841]
rs11625567	1.0000	−0.0001, [−0.0002; −0.0001]	0.9999, [0.99985; 0.99987]
rs486512	1.0000	−0.0023, [−0.00234; −0.00231]	0.9977, [0.99766; 0.99769]
rs573399	1.0000	0.0002, [0.0001; 0.0002]	1.0002, [1.0001; 1.0002]
rs2075650	1.0000	0.0018, [0.00177; 0.00178]	1.0018, [1.00177; 1.00179]
rs11906462	1.0000	0.0006, [0.00061; 0.00063]	1.0006, [1.00061; 1.00063]

## Sheet: LR without covariates
	Traditional Logistic Regression
Covariates	β, CI95%	OR, CI95%	p-value	AUC, CI95%		Accuracy		R2	F1-measure
				Train set	Test set	Train set	Test set	Train set	Train set	Test set
APOE4	1.6028, [1.1368; 2.1145]	4.9670, [3.1166; 8.2857]	1.17e-10	0.7915, [0.7431; 0.8399]	0.6431, [0.5470; 0.7393]	0.6867, [0.6324; 0.7375]	0.6667, [0.5804; 0.7454]	0.7725	0.7114	0.7239
SNPs
rs12054808	−1.5437, [−2.2949; −0.8334]	0.2136, [0.1008; 0.4345]	3.17e-05
rs486512	−1.3879, [−2.1565; −0.6844]	0.2496, [0.1157; 0.5044]	2.01e-04
	Traditional Logistic Regression
Covariates	β, CI95%	OR, CI95%	p-value	AUC, CI95%		Accuracy		R2	F1-measure
				Train set	Test set	Train set	Test set	Train set	Train set	Test set
APOE4	1.4993, [1.0743; 1.9590]	4.4785, [2.9280; 7.0923]	2.85e-11	0.7193, [0.6698; 0.7688]	0.6702, [0.5823; 0.7582]	0.6867, [0.6324; 0.7375]	0.6741, [0.5881; 0.7522]	0.8616	0.7288	0.7317
SNPs
−
	Traditional Logistic Regression
Covariates	β, CI95%	OR, CI95%	p-value	AUC, CI95%		Accuracy		R2	F1-measure
				Train set	Test set	Train set	Test set	Train set	Train set	Test set
APOE4	1.6028, [1.1368; 2.1145]	4.9670, [3.1166; 8.2857]	1.17e-10	0.7915, [0.7431; 0.8399]	0.6431, [0.5470; 0.7393]	0.6867, [0.6324; 0.7375]	0.6667, [0.5804; 0.7454]	0.7725	0.7114	0.7239
SNPs
rs12054808	−1.5437, [−2.2949; −0.8334]	0.2136, [0.1008; 0.4345]	3.17e-05
rs4391167
rs486512	−1.3879, [−2.1565; −0.6844]	0.2496, [0.1157; 0.5044]	2.01e-04
	Traditional Logistic Regression
Covariates	β, CI95%	OR, CI95%	p-value	AUC, CI95%		Accuracy		R2	F1-measure
				Train set	Test set	Train set	Test set	Train set	Train set	Test set
APOE4	1.6028, [1.1368; 2.1145]	4.9670, [3.1166; 8.2857]	1.17e-10	0.7915, [0.7431; 0.8399]	0.6431, [0.5470; 0.7393]	0.6867, [0.6324; 0.7375]	0.6667, [0.5804; 0.7454]	0.7725	0.7114	0.7239
SNPs
rs12054808	−1.5437, [−2.2949; −0.8334]	0.2136, [0.1008; 0.4345]	3.17e-05
rs4391167
rs486512	−1.3879, [−2.1565; −0.6844]	0.2496, [0.1157; 0.5044]	2.01e-04
	Traditional Logistic Regression
Covariates	β, CI95%	OR, CI95%	p-value	AUC, CI95%		Accuracy		R2	F1-measure
				Train set	Test set	Train set	Test set	Train set	Train set	Test set
APOE4	1.6372, [1.0066; 2.3310]	5.1405, [2.7363; 10.2882]	1.14e-06	0.7942, [0.7447; 0.8436]	0.6316, [0.5306; 0.7327]	0.6867, [0.6324; 0.7375]	0.6667, [0.5804; 0.7454]	0.7724	0.7114	0.7239
SNPs
rs12054808	−1.5410, [−2.2928; −0.8305]	0.2142, [0.1010; 0.4358]	3.31e-05
rs4391167
rs486512	−1.3845, [−2.1541; −0.6804]	0.2504, [0.1160; 0.5064]	2.12e-04
rs2075650	−0.0510, [−0.7206; 0.5993]	0.9503, [0.4864; 1.8208]	8.79e-01
	Traditional Logistic Regression
Covariates	β, CI95%	OR, CI95%	p-value	AUC, CI95%		Accuracy		R2	F1-measure
				Train set	Test set	Train set	Test set	Train set	Train set	Test set
APOE4	1.4351, [0.7408; 2.1976]	4.2002, [2.0975; 9.0036]	1.06e-04	0.8679, [0.8286; 0.9072]	0.6174, [0.5184; 0.7164]	0.7785, [0.7286; 0.8230]	0.5333, [0.4456; 0.6196]	0.6478	0.8108	0.5039
SNPs
rs6427160	−0.8391, [−1.2951; −0.4037]	0.4321, [0.2739; 0.6679]	2.13e-04
rs12054808	−1.3242, [−2.1529; −0.5389]	0.2660, [0.1161; 0.5834]	1.23e-03
rs4391167
rs11625567	−1.0070, [−1.6439; −0.4070]	0.3653, [0.1932; 0.6656]	1.39e-03
rs486512	−1.4274, [−2.2792; −0.6559]	0.2399, [0.1024; 0.5190]	4.93e-04
rs573399	1.2305, [0.6226; 1.8788]	3.4228, [1.8639; 6.5458]	1.17e-04
rs2075650	0.0683, [−0.6589; 0.7790]	1.0707, [0.5174; 2.1792]	8.51e-01
rs11906462	1.2167, [0.5293; 1.9714]	3.3761, [1.6977; 7.1806]	8.96e-04
	Traditional Logistic Regression
Covariates	β, CI95%	OR, CI95%	p-value	AUC, CI95%		Accuracy		R2	F1-measure
				Train set	Test set	Train set	Test set	Train set	Train set	Test set
APOE4	1.4351, [0.7408; 2.1976]	4.2002, [2.0975; 9.0036]	1.06e-04	0.8679, [0.8286; 0.9072]	0.6174, [0.5184; 0.7164]	0.7785, [0.7286; 0.8230]	0.5333, [0.4456; 0.6196]	0.6478	0.8108	0.5039
SNPs
rs6427160	−0.8391, [−1.2951; −0.4037]	0.4321, [0.2739; 0.6679]	2.13e-04
rs12054808	−1.3242, [−2.1529; −0.5389]	0.2660, [0.1161; 0.5834]	1.23e-03
rs4391167
rs11625567	−1.0070, [−1.6439; −0.4070]	0.3653, [0.1932; 0.6656]	1.39e-03
rs486512	−1.4274, [−2.2792; −0.6559]	0.2399, [0.1024; 0.5190]	4.93e-04
rs573399	1.2305, [0.6226; 1.8788]	3.4228, [1.8639; 6.5458]	1.17e-04
rs2075650	0.0683, [−0.6589; 0.7790]	1.0707, [0.5174; 2.1792]	8.51e-01
rs11906462	1.2167, [0.5293; 1.9714]	3.3761, [1.6977; 7.1806]	8.96e-04
rs4391167	SNP removed because of collinearity with rs12054808 (they are equal)
